# Supplementary material
Source: publisher figshare collection journal article supplement (https://tandf.figshare.com/ndownloader/files/20499816)
Supplement: Supplementary file 1 [file 20499816]

Supporting Information

Vibrational energy redistribution and vibrational dynamics of methanol mixed with Rhodamine101 dye

Xiaosong Liu1, Wei Zhang2, Weilong Liu3, Yunfei Song3, Zhuo Wang1, Wenjing Zhang*1

1 *International Collaborative Laboratory of 2D Materials for Optoelectronics Science and Technology of Ministry of Education, Institute of Microscale Optoelectronics, Shenzhen University - 3688 Nanhai Avenue, Nanshan District, Shenzhen,518060, China*

2 *Tianjin Institute of Power Sources -No. 6, 7th Haitai Huake Road, Xiqing district, Tianjin, 300384, China*

3 *Department of Physics, Harbin Institute of Technology - 92 Xidazhi Street, Nangang District, Harbin, 150001, China*


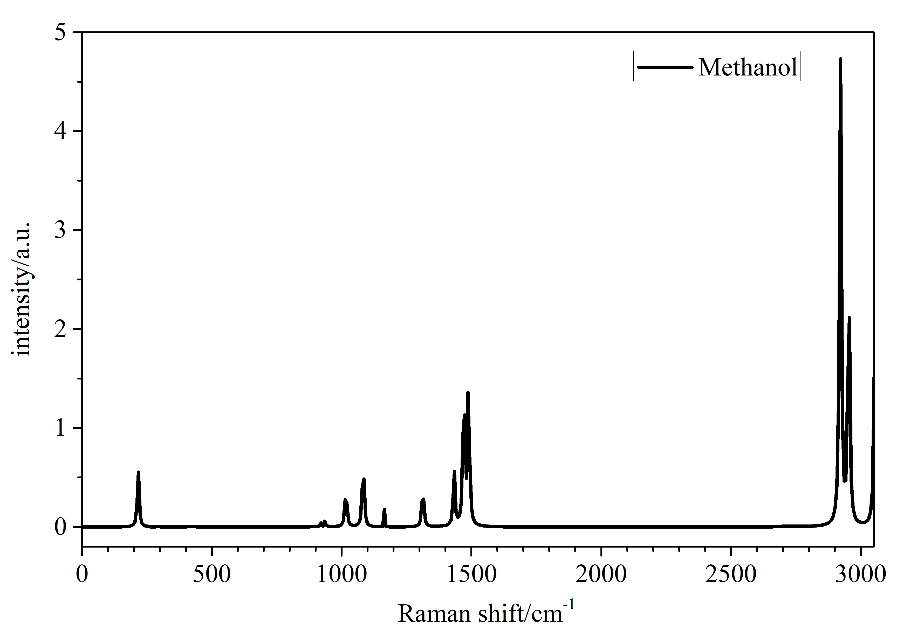


Figure 1. Raman spectrum of methanol

| Symmetry (Cs) | | Vibrational modes/cm-1 | Assignment |
| --- | --- | --- | --- |
| Aˊ  Aˊ  Aˊ  Aˊ  Aˊ  Aˊ  Aˊ  Aˊ  Aˊˊ  Aˊˊ  Aˊˊ  Aˊˊ | 3628  2993  **2834**  1464      1107  1033  **2940**  1464  1165  246 | | OH str  CH3 d-str  CH3 s-str  CH3 d-deform (OV)      CH3 rock  CO str  CH3 str  CH3 deform (OV)  CH3 rock  torsion |

Table 1. Vibrational assignment of methanol in the liquid phase

OV represents vibrational bands overlapping
